# Supplementary material for: Evaluation of poly(hydroxyethyl methacrylate) imaging chemistries for micropatterning applications
Source: Royal Society of Chemistry journal article supplement (doi:10.1039/b407485h), 2004-01-01
Supplement: b407485h.doc [file b407485h.doc]

# Electronic Supplementary Information for Journal of Materials Chemistry

Evaluation of poly(hydroxyethyl methacrylate) imaging chemistries for micropatterning applications

# M. Vasilopoulou,a S. Boyatzis,b I. Raptis,a D. Dimotikallic and P Argitisa*

**PMMAs reaction monitoring using MS studies**: PMMA films (1μm thickness) baked at 160 C for 5 min (specimen code numbered PMMA unexposed) and identical PMMA films similarly baked and further UV-exposed (broadband UV exposure with Hg-Xe for 2000 sec, PMMA exposed) were subjected to DTMS. Total Ionic Currents (TICs) were recorded for both specimens and are presented in the following Figure:

Region *A* in the TIC was recorded at relatively low probe temperatures (130-250 C), while region B was developed during an isotherm at 320 C for 3 minutes. Volatile compounds were detected in TIC region A, while molecular fragments thermally produced from higher MW compounds were detected in TIC region B. Mass spectra corresponding to TIC region B in films of PMMA-unexposed and region A in PMMA-exposed films were also detected and used for the identification of produced species. Results are shown in the figure below:

In the case of both PMMA films the monomer 2-methyl-methacrylate MMA (or 2-methyl, methyl isopropenoate, mass peaks at m/z 41, 69, 99, 100) is the typical compound detected. This compound is formed during the pyrolysis (region B) of unexposed PMMA inside the Mass Spectrometer chamber. Exposed PMMA samples showed a significantly pronounced volatile region (region A) containing typical MMA peaks, together with other hydrocarbon products. Comparison of TIC areas between PMMA-unexposed and PMMA-exposed samples showed the volatile fraction (region A) to be significantly higher for PMMA-exposed. These results confirm the mechanism accepted for the positive tone lithographic behaviour of UV-exposed PMMA, where chain scission and depolymerization producing 2-methyl methacrylate is the main reaction path.1 Results are summarized in Table 1.

Table 1: TIC area values and ratios for PMMA specimen

| **Specimen #** | **description** | **Ionic traces detected in TIC regions** | | **Ratios of areas under regions A/B*** |
| --- | --- | --- | --- | --- |
| PMMA-unexposed | PMMA films, baked | A | mostly plasticizers | 0.1 |
| B | MMA (m/z 100, 69, 41) |
| PMMA-exposed | PMMA films, baked, UV-exposed | A | Aliphatic chain structure, MMA-related structures (m/z 69, 41), plasticizers | 0.9 |
| B | Aliphatic acid, MMA-related structures (m/z 69, 41) |
| B | HEMA-related structure (m/z 113, 87, 69, 41, 31) |

* based on mass scan

**FTIR spectroscopy results for PHEMAs reaction**:FTIR spectroscopy has been applied to follow the chemical reactions occurring during exposure of PHEMA films in deep UV. FTIR spectra of PHEMA films 1 μm thick: unexposed (prebaked at 160 oC for 5 min) and broadband UV-exposed (7000s) are shown in the following figure:

As it can be seen all peak intensities were slightly reduced after exposure. This reduction can be attributed to the fact that part of the material has been volatilised following partial depolymerization. The hydroxyl and carbonyl related bands are not reduced more than the other peaks as the reaction proceeds. At the same time the appearance of two bands assigned to stretching of a double bond (C=C) conjugated with the carbonyl group (at wavenumbers 1265.8 and 1101.5 cm-1) is observed. This is attributed to the formation of 2-methyl, 2-hydroxyethyl isopropenoate (CH2=C(CH3)-C=O-O-CH2-CH2-OH) (HEMA monomer) during exposure. A certain amount of this molecule is kept in the polymer film due to its large size and this makes possible the detection of the above bands.

IR spectroscopy results also show absence of free carboxylic acid in the reaction products. IR spectra of carboxylic acids show a narrow band at 2500-3000 cm-1, due to the carboxylic –OH stretching. On the contrary, in the case of alcoholic OH a wide band at 3300-3600 cm-1 is expected in both unexposed and exposed material spectra. The appearance of a band at the irradiated material that would indicate the formation of poly (methacrylic acid) was not detected.

1. W. Moreau, *Semiconductor Lithography*, Plenum Press, p. 59.
